# Supplementary material for: Prediction of Binding Free Energy of Protein–Ligand Complexes with a Hybrid Molecular Mechanics/Generalized Born Surface Area and Machine Learning Method
Source: PubMed Central journal article supplement — ACS Omega. 2021 Nov 21;6(48):32938–47. doi: 10.1021/acsomega.1c04996 (PMC8655939; doi:10.1021/acsomega.1c04996), 2021-11-21
Supplement: ao1c04996_si_001.pdf [file ao1c04996_si_001.pdf]

## Supporting Information

### Prediction of binding free energy of protein-ligand complexes with a hybrid MM/GBSA and machine learning method

Lina Dong,<sup>†‡</sup> Xiaoyang Qu,<sup>†</sup> Yuan Zhao,<sup>¶</sup> Binju Wang<sup>†\*</sup>

*<sup>†</sup>State Key Laboratory of Physical Chemistry of Solid Surfaces and Fujian Provincial Key Laboratory of Theoretical and Computational Chemistry, College of Chemistry and Chemical Engineering, Xiamen University, Xiamen 360015, P. R. China.*

*<sup>‡</sup>Collaborative Innovation Center of Chemistry for Energy Materials, College of Chemistry and Chemical Engineering, Xiamen University, Xiamen, China*

*<sup>¶</sup>The Key Laboratory of Natural Medicine and Immuno-Engineering, Henan University, Kaifeng, China*

\*Correspondence to: [wangbinju2018@xmu.edu.cn](mailto:wangbinju2018@xmu.edu.cn)

**Table S1.** Brief description and the tuned hyperparameters of each machine learning method.

| ML method                                     | Brief description                                                                                                                                                                                                                                                                                                                                                           | Tuned hyperparameters |
|-----------------------------------------------|-----------------------------------------------------------------------------------------------------------------------------------------------------------------------------------------------------------------------------------------------------------------------------------------------------------------------------------------------------------------------------|-----------------------|
| Ridge regression <sup>1</sup><br>(RR)         | Ridge regression is a kind of biased estimation regression method for collinear data analysis. In essence, it is an improved least square estimation method. By abandoning the unbiased property of least square method, the regression coefficient is obtained at the cost of losing part of information and reducing precision.                                           | alpha=0.1             |
| Decision tree regression <sup>2</sup><br>(DT) | Decision tree is a simple and commonly used supervised learning model based on tree. According to the use, it can be divided into classification tree and regression tree. A regression tree corresponds to a partition of the input space (that is, the feature space) and the output value on the partition unit.                                                         | max_depth=3.0         |
| Extra trees regression <sup>3</sup><br>(ET)   | Extreme tree regression is also a model based on tree regression, but the major discrepancy is that it uses extra-trees to replace the conventional decision-trees. Unlike conventional top-down tree construction algorithms, it applies randomization in both selecting features and cut-point features, thus leading to its totally randomized trees in an extreme case. | n_estimators=50       |

|                                                 |                                                                                                                                                                                                                                                                                                                            |                                                               |
|-------------------------------------------------|----------------------------------------------------------------------------------------------------------------------------------------------------------------------------------------------------------------------------------------------------------------------------------------------------------------------------|---------------------------------------------------------------|
| SVM regression <sup>4</sup><br>(SVM)            | SVM regression is a variation of support vector machine (SVM), and performs the regression task by searching a hyperplane with the optimized sum of the distances from the data points to the hyperplane.                                                                                                                  | max_iter=3000                                                 |
| Random forest regression <sup>5</sup><br>(RF)   | Random forest is an ensemble learning approach that can effectively improve the predictive accuracy by combining the idea of bagging and random selection of features to establish a decision tree set of control variables. It is essentially an improvement of decision tree algorithm.                                  | n_estimators=[100,200,300,400,500,600]<br>max_depth=[3,5,7,9] |
| Neural network regression <sup>6</sup><br>(DNN) | Neural network is one of the typical deep learning methods which include input layers, hidden layers and output layers. For the regression problem in supervised learning, it optimizes the weight and bias between layers according to the back propagation of the loss between the target value and the predicted value. | max_iter=500<br>hidden_layer_sizes=1000                       |
| Extreme gradient boosting <sup>7</sup><br>(XGB) | Extreme gradient boosting is essentially a kind of gradient boosting decision tree(GBDT), which is used widely by data scientists to achieve state-of-the-art results on many machine learning challenges. It improves the efficiency of calculation loss and optimization.                                                | n_estimators=[100,200,300,400,500,600]<br>max_depth=[3,5,7,9] |

**Table S2.** Performance (Pearson’s correlation coefficient and MSE value) of seven machine learning models on the validation set with three different feature set.

| Features                     | Model name                      | MSE   | Pearsonr |
|------------------------------|---------------------------------|-------|----------|
| MM/GBSA<br>(G)               | Linear regression (LR)          | 4.97  | 0.503    |
|                              | Ridge regression (RR)           | 4.97  | 0.503    |
|                              | Decision tree regression (DT)   | 4.63  | 0.548    |
|                              | Extra trees regression (ET)     | 5.91  | 0.511    |
|                              | SVM regression (SVM)            | 5.08  | 0.507    |
|                              | Random forest regression (RF)   | 4.69  | 0.551    |
|                              | Neural network regression (DNN) | 23.70 | 0.508    |
|                              | Extreme gradient boosting (XGB) | 6.34  | 0.501    |
| MM/GBSA+X-<br>Score<br>(G+X) | Linear regression (LR)          | 4.93  | 0.538    |
|                              | Ridge regression (RR)           | 4.93  | 0.538    |
|                              | Decision tree regression (DT)   | 5.05  | 0.522    |
|                              | Extra trees regression (ET)     | 4.26  | 0.598    |
|                              | SVM regression (SVM)            | 5.21  | 0.538    |
|                              | Random forest regression (RF)   | 4.12  | 0.616    |
|                              | Neural network regression (DNN) | 21.07 | 0.559    |

---

|              |                                 |       |       |
|--------------|---------------------------------|-------|-------|
|              | Extreme gradient boosting (XGB) | 6.28  | 0.550 |
|              | Linear regression (LR)          | 4.25  | 0.610 |
|              | Ridge regression (RR)           | 4.25  | 0.610 |
| MM/GBSA+X-   | Decision tree regression (DT)   | 4.66  | 0.547 |
| Score+       | Extra trees regression (ET)     | 3.65  | 0.656 |
| Ligand based | SVM regression (SVM)            | 4.44  | 0.608 |
| (G+X+L)      | Random forest regression (RF)   | 3.73  | 0.647 |
|              | Neural network regression (DNN) | 11.93 | 0.596 |
|              | Extreme gradient boosting (XGB) | 4.96  | 0.598 |

---

**Table S3.** Scoring and docking power of GXLE and scoring functions benchmarked in CASF-2016.

| method          | scoring<br>power | ranking<br>power | method              | scoring<br>power | ranking<br>power |
|-----------------|------------------|------------------|---------------------|------------------|------------------|
| GXLE            | 0.762            | 0.63             | PLP2@DS             | 0.563            | 0.589            |
| deltaVinaRF20   | 0.732            | 0.626            | Affinity-dG@MOE     | 0.552            | 0.604            |
| X-Score         | 0.631            | 0.604            | LigScore2@DS        | 0.54             | 0.608            |
| X-ScoreHS       | 0.629            | 0.547            | D-Score@SYBYL       | 0.531            | 0.577            |
| deltaSAS        | 0.625            | 0.588            | LUDI2@DS            | 0.526            | 0.629            |
| X-ScoreHP       | 0.621            | 0.573            | GlideScore-SP       | 0.513            | 0.419            |
| ASP@GOLD        | 0.617            | 0.553            | LUDI3@DS            | 0.502            | 0.532            |
| ChemPLP@GOLD    | 0.614            | 0.633            | GBVI_WSA-<br>dG@MOE | 0.496            | 0.489            |
| X-ScoreHM       | 0.609            | 0.603            | LUDI1@DS            | 0.494            | 0.612            |
| AutodockVina    | 0.604            | 0.528            | GlideScore-XP       | 0.467            | 0.257            |
| DrugScore2018   | 0.602            | 0.607            | Jain@DS             | 0.457            | 0.521            |
| DrugScoreCSD    | 0.596            | 0.63             | LigScore1@DS        | 0.425            | 0.599            |
| ASE@MOE         | 0.591            | 0.439            | PMF@DS              | 0.422            | 0.537            |
| ChemScore@SYBYL | 0.59             | 0.593            | GoldScore@GOLD      | 0.416            | 0.284            |
| PLP1@DS         | 0.581            | 0.582            | London-dG@MOE       | 0.405            | 0.593            |
| ChemScore@GOLD  | 0.574            | 0.526            | PMF@SYBYL           | 0.262            | 0.449            |

|               |       |       |          |       |       |
|---------------|-------|-------|----------|-------|-------|
| G-Score@SYBYL | 0.572 | 0.591 | PMF04@DS | 0.212 | 0.481 |
| Alpha-HB@MOE  | 0.569 | 0.535 |          |       |       |

---

The scoring and ranking power of scoring functions benchmarked in CASF-2016 was obtained from Ref<sup>8</sup>.

**Table S4.** PDBid of 10 kind of selected targets from PDBbind general set.

| target | PDBid |      |      |      |      |      |      |      |
|--------|-------|------|------|------|------|------|------|------|
| BACE-1 | 1llb  | 1ymx | 2b8l | 2b8v | 2f3e | 2f3f | 2hiz | 2hm1 |
|        | 2iqg  | 2irz | 2is0 | 2oah | 2ohm | 2ohp | 2ohq | 2ohr |
|        | 2ohs  | 2oht | 2ohu | 2p83 | 2p8h | 2q9n | 2qk5 | 2qmd |
|        | 2qmf  | 2qp8 | 2qzk | 2qzl | 2va5 | 2va6 | 2va7 | 2vie |
|        | 2viz  | 2vj6 | 2vj7 | 2vj9 | 2vnm | 2vnn | 2wez | 2wf0 |
|        | 2wf1  | 2wf2 | 2wf3 | 2wf4 | 2xfi | 2xfj | 2xfk | 3dv1 |
|        | 3dv5  | 3fkt | 3hvg | 3hw1 | 3in4 | 3ine | 3inf | 3ivh |
|        | 3ivi  | 3k5c | 3k5d | 3k5g | 3kn0 | 3l58 | 3l5c | 3l5d |
|        | 3l5e  | 3l5f | 3lhg | 3lnk | 3lpj | 3msj | 3msk | 3msl |
|        | 3s2o  |      |      |      |      |      |      |      |
| CHK1   | 2ayp  | 2cgw | 2cgx | 2e9n | 2e9o | 2gdo | 2ghg | 2r0u |
|        | 2ywp  | 3f9n | 3ot3 | 3ot8 | 3pa3 | 3pa4 | 3pa5 |      |
| DPP4   | 1rwq  | 2bub | 2fjp | 2ogz | 2onc | 2rip | 3ccb | 3g0b |
|        | 3g0d  | 3g0g | 3kwf | 3kwj | 3g0c |      |      |      |
| ER     | 1sj0  | 1uom | 1x7r | 1xp1 | 1xp6 | 1xpc | 2blz |      |
| LTA-4H | 3cho  | 3chp | 3chq | 3chr | 3chs | 3fh5 | 3fh8 | 3fhe |
|        | 3fts  | 3ftu | 3ftv | 3fty | 3fu0 | 3fu3 | 3fu6 | 3fue |
|        | 3fuf  | 3fuh | 3fuj | 3fuk | 3ful | 3fum |      |      |
| P38a   | 1a9u  | 1bl7 | 1bmk | 1di9 | 1w84 | 1ywr | 1zyj | 1zzl |
|        | 2gfs  | 2qd9 | 3ds6 | 3dt1 | 3gfe | 3itz | 3mvm | 3nnw |



|          |      |      |      |      |      |      |      |      |
|----------|------|------|------|------|------|------|------|------|
|          | 3nww | 3ocg |      |      |      |      |      |      |
| PPAR     | 1nyx | 1zeo | 2f4b | 2g0h | 3bc5 | 3fei | 3g8i | 3g9e |
|          | 3gwx | 3gz9 | 3kdt |      |      |      |      |      |
| PTP1B    | 2cm7 | 2cm8 | 2cmb | 2cmc | 2cng | 2cnh | 2cni | 2f6v |
|          | 2f71 | 2veu | 2vev | 2vew | 2vex | 2vey |      |      |
| Thrombin | 1riw | 1way | 1wbg | 2a2x | 2ank | 2anm | 2bdy | 2c8w |
|          | 2c8x | 2c8y | 2c90 | 2c93 | 2feq | 2fes | 2pks |      |
| Renin    | 1bil | 1bim | 1hrn | 1rne | 2bks | 2bkt | 2v0z | 2v10 |
|          | 2v11 | 2v12 | 2v13 | 2v16 | 3g6z | 3g70 | 3g72 | 3gw5 |
|          | 3km4 | 3oad | 3oag | 3oot | 3oqf | 3oqk |      |      |

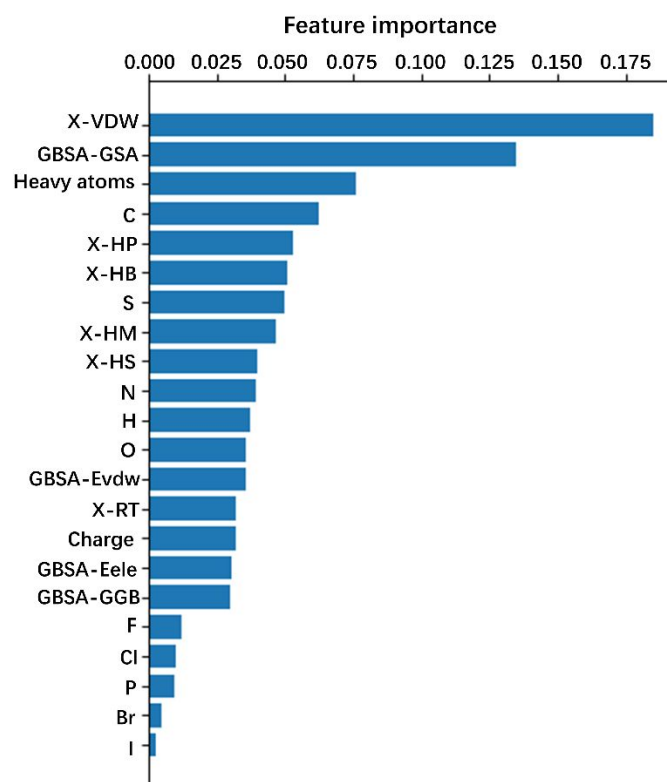

**Figure S1.** Feature importance. Feature importance are calculated based on the number of times a feature is used to split the data across all trees. Here, all 22 features are shown.

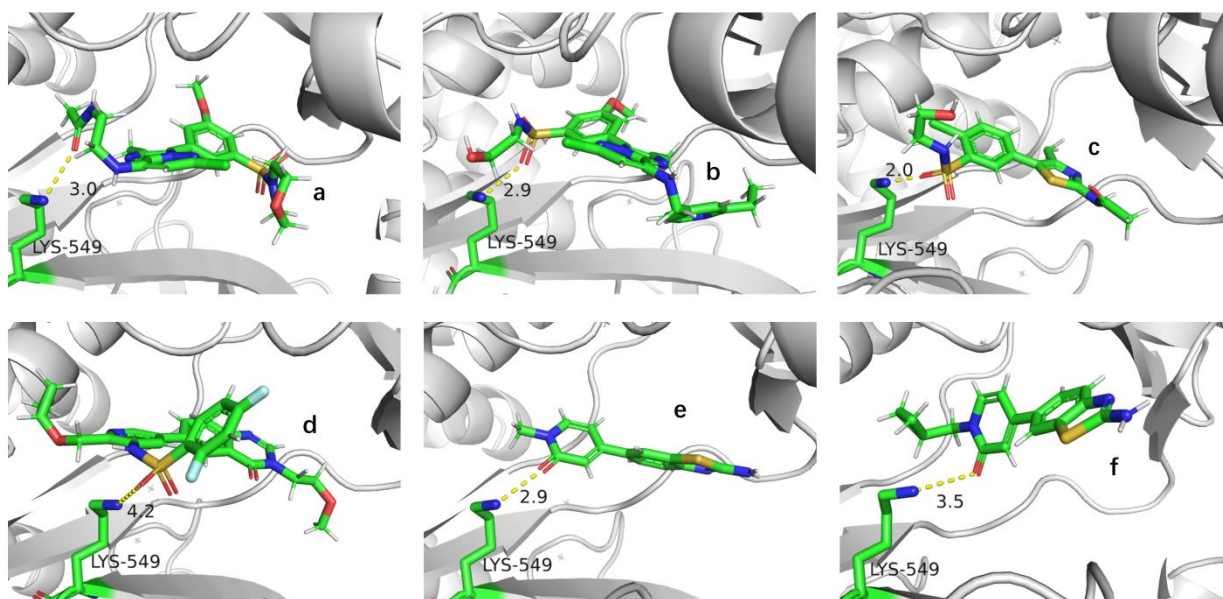

**Figure S2.** Figure in the upper right corner shows the crystal structure (PDB id: 4D0L) of PI4KIII $\beta$  in complex with N-(5-(4-chloro-3-(2-hydroxy-ethylsulfamoyl)-phenylthiazole-2-yl)-acetamide (named **c**), which was used as the receptor structure in molecular docking. And five selected PI4KIII $\beta$  inhibitors (named **a, b, d, e, f**) used for the evaluation of ranking power of GXLE together with their binding modes predicted by molecular docking.

## REFERENCES

- (1) P. J. Brown, J. V. Z., Adaptive Multivariate Adaptive Ridge Regression. *The Annals of Statistics* **1980**, 8, 64-74.
- (2) Brodley, C. E.; Utgoff, P. E., MULTIVARIATE DECISION TREES. *Mach. Learn.* **1995**, 19, 45-77.
- (3) Geurts, P.; Ernst, D.; Wehenkel, L., Extremely randomized trees. *Mach. Learn.* **2006**, 63, 3-42.
- (4) Breerton, R. G.; Lloyd, G. R., Support vector machines for classification and regression. *Analyst* **2010**, 135, 230-267.
- (5) Breiman, L., Random forests. *Mach. Learn.* **2001**, 45, 5-32.
- (6) Sainath, T. N.; Vinyals, O.; Senior, A.; Sak, H.; Ieee CONVOLUTIONAL, LONG SHORT-TERM MEMORY, FULLY CONNECTED DEEP NEURAL NETWORKS. In 2015 Ieee International Conference on Acoustics, Speech, and Signal Processing; Ieee: New York, 2015, pp 4580-4584.
- (7) Chen, T.; Guestrin, C., XGBoost: A Scalable Tree Boosting System. In Proceedings of the 22nd ACM SIGKDD International Conference on Knowledge Discovery and Data Mining; Krishnapuram, B., Shah, A., Aggarwal, C., Shen, D., Rastogi, R., Eds.; ACM: San Francisco, CA, 2016, pp 785-794.

(8) Su, M.; Yang, Q.; Du, Y.; Feng, G.; Liu, Z.; Li, Y.; Wang, R., Comparative Assessment of Scoring Functions: The CASF-2016 Update. *J. Chem. Inf. Model.* **2019**, *59*, 895-913.
